# Supplementary material for: Development of Synthetic mRNAs Encoding Split Cytotoxic Proteins for Selective Cell Elimination Based on Specific Protein Detection
Source: MDPI journal article supplement (doi:10.3390/pharmaceutics15010213), 2023-01-07
Supplement: s1 [file s1]

# Development of Synthetic mRNAs Encoding Split Cytotoxic Proteins for Selective Cell Elimination Based on Specific Protein Detection

Kendall Free, Hideyuki Nakanishi and Keiji Itaka

**Table S1.** List of primers used to prepare template DNAs for in vitro transcription.

[illegible]

**Table S2.** Full sequences of template DNAs for in vitro transcription.

| ID            | hBarnase                                                                                                                                                                                                                                                                                                                                                                                                                                                                                                                                                                                                                                                                                                              |
|---------------|-----------------------------------------------------------------------------------------------------------------------------------------------------------------------------------------------------------------------------------------------------------------------------------------------------------------------------------------------------------------------------------------------------------------------------------------------------------------------------------------------------------------------------------------------------------------------------------------------------------------------------------------------------------------------------------------------------------------------|
| Template pDNA | pUTR2-hBarnase                                                                                                                                                                                                                                                                                                                                                                                                                                                                                                                                                                                                                                                                                                        |
| Primers       | HNC-542, HNT-7 and HNT-9                                                                                                                                                                                                                                                                                                                                                                                                                                                                                                                                                                                                                                                                                              |
| Features      | T7 promoter (for CleanCap AG Reagent): 11-30, Kozak sequence (including start codon): 79-87, hBarnase gene: 88-417, Stop codon: 418-420                                                                                                                                                                                                                                                                                                                                                                                                                                                                                                                                                                               |
| Sequence      | <p>CAGTGAATTGTAATACGACTCACTATAAGGCGAATTAAGAGAGAAAAGAAGAGTAA-GAA-</p> <p>GAAATATAAGACACCGGTCGCCACCATGGCCCAAGTGATCAACACCTTCGACGGCGTGCCGACTACCTGCAGACATAACCACAAGCTGCCCCGACAACTACATCACCAA-GAGCGAGGCCCAGGCTCTCGGATGGGTTCCTCTAAGGGAAACCTGGCCGATGTGGCCCCTGGCAAGTCTATCGGCGGCGACATCTTCAGCAACAGAGAGGGCAAGCTGCCTGGCAA-GAGCGGCAGAACTTGGAGAGAGGCCGACATCAACTACACCAGCGGCTTCCGGAACAGCGACCGGATCCTGTACAGCAGCGACTGGCTGATCTACAAGACCACCGACCACTAC-CAGAC-</p> <p>CTTCACCAAGATCAGATGAATCTAGACCTTCTGCGGGGCTTGCCCTTCTGGCCATGCCCTTCTTCTCTCCCTTGACCTGTACCTCTTGGTCTTTGAATAAAGCCTGAGTAG-GAAAAAAAAAAAAAAAAAAAAAAAAAAAAAAAAAAAAAAAAAAAAAAAAAAAAAAAAAAAAA</p> <p>AAAAAAAAAAAAAAAAAAAAAAAAAAAAAAAAAAAAAAAAAAAAAAAAAAAAAAAAAAAAA</p> <p>AAAAAAAAAAAA</p> |
| ID            | hBarnase-21N                                                                                                                                                                                                                                                                                                                                                                                                                                                                                                                                                                                                                                                                                                          |

|               |                                                                                                                                                                                                                                                                                                                                                                                                                                                                                                                                                                                                                                                                                                                                                                                                                                                                                                                                                                                                                                                                                                                                                                                                                                                                                                                                                                                                                                                                                                                                                                                       |
|---------------|---------------------------------------------------------------------------------------------------------------------------------------------------------------------------------------------------------------------------------------------------------------------------------------------------------------------------------------------------------------------------------------------------------------------------------------------------------------------------------------------------------------------------------------------------------------------------------------------------------------------------------------------------------------------------------------------------------------------------------------------------------------------------------------------------------------------------------------------------------------------------------------------------------------------------------------------------------------------------------------------------------------------------------------------------------------------------------------------------------------------------------------------------------------------------------------------------------------------------------------------------------------------------------------------------------------------------------------------------------------------------------------------------------------------------------------------------------------------------------------------------------------------------------------------------------------------------------------|
| Template pDNA | pUTR2-hBarnase-21N                                                                                                                                                                                                                                                                                                                                                                                                                                                                                                                                                                                                                                                                                                                                                                                                                                                                                                                                                                                                                                                                                                                                                                                                                                                                                                                                                                                                                                                                                                                                                                    |
| Primers       | HNC-542, HNT-7 and HNT-9                                                                                                                                                                                                                                                                                                                                                                                                                                                                                                                                                                                                                                                                                                                                                                                                                                                                                                                                                                                                                                                                                                                                                                                                                                                                                                                                                                                                                                                                                                                                                              |
| Features      | T7 promoter (for CleanCap AG Reagent): 11-30, Kozak sequence (including start codon): 79-87, N-terminal split Barnase gene: 88-147, Caged eNpu N-intein gene: 148-714, Anti-eDHFR nanobody Nb113 gene: 721-1122, Stop codon: 1123-1125                                                                                                                                                                                                                                                                                                                                                                                                                                                                                                                                                                                                                                                                                                                                                                                                                                                                                                                                                                                                                                                                                                                                                                                                                                                                                                                                                |
| Sequence      | <p>CAGTGAATTGTAATACGACTCACTATAAGGCGAATTAAGAGAGAAAAGAAGAGTAA-GAA-</p> <p>GAAATATAAGACACCGGTCGCCACCATGGCCCAAGTGATCAACACCTTCGACGGCGTGGCCGACTACCTGCAGACATAACCACAAGCTGTGCCTGAGCTACGAGACAGAGATCCTGACCGTG-</p> <p>GAATACGGCCTGCTGCCTATCGGCAAGATCGTGGAAAAGCGGATCGAGTGCACCGTGTA CAGCGTGGACAACAACGGCAACATCTACACCCAGCCTGTGGCTCAGTGGCAC-</p> <p>GACAGAGGCAAGCAGAAGGTGTTTCGAGTACTGCCTGGAAGATGGCAGCCTGATCAGAG CCACCAAGGACCACAAGTTCATGACAGTGGACGGCCAGATGCTGCCCATCAAAGA-</p> <p>GATCTTCCGGCGGAAGCTGGACCTGATGAGAGTGGACAACCTGCCTAATGGCTCTGGCG GCGAGAACCTGTACTTCCAAGGGGAAAATCTCTACTTTCAAGGCGGCAGCGGCGG-</p> <p>CATCGA-</p> <p>GATCGCCACAGAGAAGTATCTGGGCGAGCAGAACGTGTACGACATCGGCGTGGAACGG GACCACAACCTTCGCCCTGAAGAACGGCGGCTACTTCCAGGGAATTGAGATTGCCAC-</p> <p>CGA-</p> <p>GAAATACCTCGGGGAACAGAATGTGTATGATATCGGAGTCGAGCGCGATCACAATTTTG CCCTGAAAAATGGCGGATCCAGGTCCAGCTGCAAGAGTCTGGCGGAGGACTT-</p> <p>GTTTCAGGCTGGCGGAAGCCTGAGACTGAGCTGTACTGCCAGCGGCAGAACCTTCAGCAG CTATGCCATGGGCTGGTTCAGACAGACCCCTGGCAAAGAACGCGAG-</p> <p>TTCGTGGCCGCCATTACATGGGGCGGAAGCACAACACTGTACGCCGACTCTGTGAAGGG CAGATTCACCATGAGCCGGGACAACGCCAAGAACACCGTGTACCTG-</p> <p>CAGATGAACAGCCTGAAGCCAGAGGACACCGCCGTGTACTATTGTGCCGCCGATGGCAG CCAGTACAGAAGCACCTACAGCTTCAGAGACAAGCCCGACTACGGCTCTT-</p> <p>GGGGCCAGGGAACACAAGTGACCGTGTCTCTCACCACCACCATCACCATTGAATCTAG ACCTTCTGCGGGGCTTGCCCTCTGGCCATGCCCTTCTTCTCTCCCTTGACCTGTAC-</p> <p>CTCTT-</p> <p>GGTCTTTGAATAAAGCCTGAGTAGGAAAAAAAAAAAAAAAAAAAAAAAAAAAAAAAAAAAAA AAAAAAAAAAAAAAAAAAAAAAAAAAAAAAAAAAAAAAAAAAAAAAAAAAAAAAAAAAAAAA AAAAAAAAAAAAAAAAAAAAAAAAAAAAAAAAAAAAAAAAAAAAAAAAAAAAAAAAAAAAAA</p> |
| ID            | hBarnase-21C                                                                                                                                                                                                                                                                                                                                                                                                                                                                                                                                                                                                                                                                                                                                                                                                                                                                                                                                                                                                                                                                                                                                                                                                                                                                                                                                                                                                                                                                                                                                                                          |
| Template pDNA | pUTR2-hBarnase-21C                                                                                                                                                                                                                                                                                                                                                                                                                                                                                                                                                                                                                                                                                                                                                                                                                                                                                                                                                                                                                                                                                                                                                                                                                                                                                                                                                                                                                                                                                                                                                                    |
| Primers       | HNC-542, HNT-7 and HNT-9                                                                                                                                                                                                                                                                                                                                                                                                                                                                                                                                                                                                                                                                                                                                                                                                                                                                                                                                                                                                                                                                                                                                                                                                                                                                                                                                                                                                                                                                                                                                                              |
| Features      | T7 promoter (for CleanCap AG Reagent): 11-30, Kozak sequence (including start codon): 79-87, Anti-eDHFR nanobody CA1698 gene: 91-459, Caged eNpu C-intein gene: 466-792, C-terminal split Barnase gene: 793-1065, Stop codon: 1066-1068                                                                                                                                                                                                                                                                                                                                                                                                                                                                                                                                                                                                                                                                                                                                                                                                                                                                                                                                                                                                                                                                                                                                                                                                                                                                                                                                               |

|               |                                                                                                                                                                                                                                                                                                                                                                                                                                                                                                                                                                                                                                                                                                                                                                                                                                                                                                                                                                                                                                                                                                                                                                                                                                                                                                                                                                              |
|---------------|------------------------------------------------------------------------------------------------------------------------------------------------------------------------------------------------------------------------------------------------------------------------------------------------------------------------------------------------------------------------------------------------------------------------------------------------------------------------------------------------------------------------------------------------------------------------------------------------------------------------------------------------------------------------------------------------------------------------------------------------------------------------------------------------------------------------------------------------------------------------------------------------------------------------------------------------------------------------------------------------------------------------------------------------------------------------------------------------------------------------------------------------------------------------------------------------------------------------------------------------------------------------------------------------------------------------------------------------------------------------------|
| Sequence      | CAGTGAATTGTAATACGACTCACTATAAGGCGAATTAAGAGAGAAAAAGAAGAGTAA-GAA-<br>GAAATATAAGACACCGGTCGCCACCATGGCCCAGGTCCAGCTGCAAGAGTCTGGCGGAGGACTTGTTCAAGGCTGGCGGAAGCCTGAGACTGAGCTGTAAAGCCAGCGG-CATCATCTTCAGCGTGTACAAGATGACCTGGTACAGACAGGCCCTGGCAAAGAGAGAGAGCTGGTTGCCCTGATCACCACCAACAACAATACCATGACCGTGGACAGCGTGAAGGG-CAGATTCAACCATCAGCCGGGACAACGTGCAGAACACCGTGTACCTGGAAATGAACAATCTGAAGCCCCGAGGACACCGCCGTGTACTACTGCAACGCCAATAGAGGACTGGCCGGAC-CTGCCTATTGGGGCCAGGGAACACAAGTGACCGTGTCTCTCACCACCACCATCACCATGGATCCGGCGAACAAAGAAGTGTTTCGAGTACTGCCTGGAAGATGG-CAGCCTGATCAGAGCCAC-CAAGGACCACAAGTTCATGACCGTGGACGGCCAGATGCTGCCCATCGACGAGATCTTCGAGCGCGAGCTGGACCTGATGAGAGTGGACAACCTGCCTAATGGCTCTGGCGGCGA-GAACCTG-TACTTCCAAGGGGAAAATCTCTACTTTCAAGGCGGCAGCGGCGGCATCAAGATCGCCACAAGAAAGTACCTGGGCAAGCAGAACGTGTACGACATCGGCGTGGAACGGGAC-CACAACTTCGCCCTGAAGAACGGCTTTATCGCCAGCAACTGCCCCGACAACTACATCACCAAGAGCGAGGCCAGGCTCTCGGATGGGTTGCCTCTAAGGGAAAC-CTGGCCGATGTGGCCCCTGGCAAGTCTATCGGCGGCGACATCTTCAGCAACAGAGAGGGCAAGCTGCCTGGCAAGAGCGGCAGAACTTGGAGAGAGGCCGACATCAACTACAC-CAGCGGCTTCCGGAACAGCGACCGGATCCTGTACAGCAGCGACTGGCTGATCTACAAGACCACCGACCACTACCAGACCTTCACCAAGATCAGATGAATCTAGAC-CTTCTGCGGGGCTT-GCCTTCTGGCCATGCCCTTCTTCTCTCCCTTGACCTGTACCTCTTGGTCTTTGAATAAAGCCTGAGTAG-GAAAAAAAAAAAAAAAAAAAAAAAAAAAAAAAAAAAAAAAAAAAAAAAAAAAAAAAAAAAAA<br>AAAAAAAAAAAAAAAAAAAAAAAAAAAAAAAAAAAAAAAAAAAAAAAAAAAAAAAAAAAAA<br>AAAAAAAAAAAA |
| ID            | hBarnase-36N                                                                                                                                                                                                                                                                                                                                                                                                                                                                                                                                                                                                                                                                                                                                                                                                                                                                                                                                                                                                                                                                                                                                                                                                                                                                                                                                                                 |
| Template pDNA | pUTR2-hBarnase-36N                                                                                                                                                                                                                                                                                                                                                                                                                                                                                                                                                                                                                                                                                                                                                                                                                                                                                                                                                                                                                                                                                                                                                                                                                                                                                                                                                           |
| Primers       | HNC-542, HNT-7 and HNT-9                                                                                                                                                                                                                                                                                                                                                                                                                                                                                                                                                                                                                                                                                                                                                                                                                                                                                                                                                                                                                                                                                                                                                                                                                                                                                                                                                     |
| Features      | T7 promoter (for CleanCap AG Reagent): 11-30, Kozak sequence (including start codon): 79-87, N-terminal split Barnase gene: 88-192, Caged eNpu N-intein gene: 193-759, Anti-eDHFR nanobody Nb113 gene: 766-1167, Stop codon: 1168-1170                                                                                                                                                                                                                                                                                                                                                                                                                                                                                                                                                                                                                                                                                                                                                                                                                                                                                                                                                                                                                                                                                                                                       |
| Sequence      | CAGTGAATTGTAATACGACTCACTATAAGGCGAATTAAGAGAGAAAAAGAAGAGTAA-GAA-<br>GAAATATAAGACACCGGTCGCCACCATGGCCCAAGTGATCAACACCTTCGACGGCGTGGCCGACTACCTGCAGACATAACCACAAGCTGCCCCGACAACTACATCACCAA-GAGCGAGGCCAGGCTCTCGGATGGTGCCTGAGCTACGAGACAGAGATCCTGACCGTGG AATACGGCCTGCTGCCTATCGGCAAGATCGTGGAAGAGCGGATCGAGTGCACCGTG-TACAGCGTGGACAACAACGGCAACATCTACACCCAGCCTGTGGCTCAGTGGCACGACA                                                                                                                                                                                                                                                                                                                                                                                                                                                                                                                                                                                                                                                                                                                                                                                                                                                                                                                                                                                                              |

|               |                                                                                                                                                                                                                                                                                                                                                                                                                                                                                                                                                                                                                                                                                                                                                                                                                                                                                                                                                                                                                                                                                                                                                                                                                      |
|---------------|----------------------------------------------------------------------------------------------------------------------------------------------------------------------------------------------------------------------------------------------------------------------------------------------------------------------------------------------------------------------------------------------------------------------------------------------------------------------------------------------------------------------------------------------------------------------------------------------------------------------------------------------------------------------------------------------------------------------------------------------------------------------------------------------------------------------------------------------------------------------------------------------------------------------------------------------------------------------------------------------------------------------------------------------------------------------------------------------------------------------------------------------------------------------------------------------------------------------|
|               | <p>GAGGCAAGCAGAAGGTGTTTCGAGTACTGCCTGGAAGATGGCAGCCTGATCAGAGCCAC-<br/>CAAGGACCACAAGTTCATGACAGTGGACGGCCAGATGCTGCCCATCAAAGAGATCTTCC<br/>GGCGGAAGCTGGACCTGATGAGAGTGGACAACCTGCCTAATGGCTCTGGCGGCGA-<br/>GAACCTG-<br/>TACTTCCAAGGGGAAAATCTCTACTTTCAAGGCGGCAGCGGCGGCATCGAGATCGCCAC<br/>AGAGAAGTATCTGGGCGAGCAGAACGTGTACGACATCGGCGTGGAACGGGAC-<br/>CACAACCTCGCCCTGAAGAACGGCGGCTACTTCCAGGGAATTGAGATTGCCACCGAGAA<br/>ATACCTCGGGGAACAGAATGTGTATGATATCGGAGTCGAGCGCGATCACAATTTT-<br/>GCCCTGAAAAATGGCGGATCCCAGGTCCAGCTGCAAGAGTCTGGCGGAGGACTTGTTC<br/>GGCTGGCGGAAGCCTGAGACTGAGCTGTACTGCCAGCGGCAGAACCTTCAGCAGC-<br/>TATGCCATGGGCTGGTTCAGACAGACCCCTGGCAAAGAACGCGAGTTCGTGGCCGCCAT<br/>TACATGGGGCGGAAGCACAACACTGTACGCCGACTCTGTGAAGGGCAGATTAC-<br/>CATGAGCCGGGACAACGCCAAGAACACCGTGTACCTGCAGATGAACAGCCTGAAGCCA<br/>GAGGACACCGCCGTGTACTATTGTGCCGCCGATGGCAGCCAGTACAGAAGCAC-<br/>CTACAGCTTCAGAGACAAGCCCGACTACGGCTCTTGGGGCCAGGGAACACAAGTGACC<br/>GTGTCCTCTCACCACCACCATCACCATTGAATCTAGACCTTCTGCGGGGCTT-<br/>GCCTTCTGGCCATGCCCTTCTTCTCTCCCTTGCACCTGTACCTCTTGGTCTTTGAATAAAGC<br/>CTGAGTAG-<br/>GAAAAAAAAAAAAAAAAAAAAAAAAAAAAAAAAAAAAAAAAAAAAAAAAAAAAAAAAAAAA<br/>AAAAAAAAAAAAAAAAAAAAAAAAAAAAAAAAAAAAAAAAAAAAAAAAAAAAAAAAAAAAA<br/>AAAAAAAAAAAA</p> |
| ID            | hBarnase-36C                                                                                                                                                                                                                                                                                                                                                                                                                                                                                                                                                                                                                                                                                                                                                                                                                                                                                                                                                                                                                                                                                                                                                                                                         |
| Template pDNA | pUTR2-hBarnase-36C                                                                                                                                                                                                                                                                                                                                                                                                                                                                                                                                                                                                                                                                                                                                                                                                                                                                                                                                                                                                                                                                                                                                                                                                   |
| Primers       | HNC-542, HNT-7 and HNT-9                                                                                                                                                                                                                                                                                                                                                                                                                                                                                                                                                                                                                                                                                                                                                                                                                                                                                                                                                                                                                                                                                                                                                                                             |
| Features      | T7 promoter (for CleanCap AG Reagent): 11-30, Kozak sequence (including start codon): 79-87, Anti-eDHFR nanobody CA1698 gene: 91-459, Caged eNpu C-intein gene: 466-792, C-terminal split Barnase gene: 793-1020, Stop codon: 1021-1023                                                                                                                                                                                                                                                                                                                                                                                                                                                                                                                                                                                                                                                                                                                                                                                                                                                                                                                                                                              |
| Sequence      | <p>CAGTGAATTGTAATACGACTCACTATAAGCGCAATTAAGAGAGAAAAGAAGAGTAA-<br/>GAA-<br/>GAAATATAAGACACCGGTCGCCACCATGGCCCAGGTCCAGCTGCAAGAGTCTGGCGGA<br/>GGACTTGTTCAAGGCTGGCGGAAGCCTGAGACTGAGCTGTAAAGCCAGCGG-<br/>CATCATCTTCAGCGTGTACAAGATGACCTGGTACAGACAGGCCCTGGCAAAGAGAGAG<br/>AGCTGGTTGCCCTGATCACCACCAACAACAATACCATGACCGTGGACAGCGTGAAGGG-<br/>CAGATTCACCATCAGCCGGGACAACGTGCAGAACACCGTGTACCTGGAAATGAACAAT<br/>CTGAAGCCCGAGGACACCGCCGTGTACTACTGCAACGCCAATAGAGGACTGGCCGGAC-<br/>CTGCCTATTGGGGCCAGGGAACACAAGTGACCGTGTCTCTCACCACCACCATCACCAT<br/>GGATCCGGCGAACAAGAAGTGTTCGAGTACTGCCTGGAAGATGG-<br/>CAGCCTGATCAGAGCCAC-<br/>CAAGGACCACAAGTTCATGACCGTGGACGGCCAGATGCTGCCCATCGACGAGATCTTCG</p>                                                                                                                                                                                                                                                                                                                                                                                                                                                                                                                                             |

|               |                                                                                                                                                                                                                                                                                                                                                                                                                                                                                                                                                                                                                                                                                                                                                                                                                                                                                                                                                                           |
|---------------|---------------------------------------------------------------------------------------------------------------------------------------------------------------------------------------------------------------------------------------------------------------------------------------------------------------------------------------------------------------------------------------------------------------------------------------------------------------------------------------------------------------------------------------------------------------------------------------------------------------------------------------------------------------------------------------------------------------------------------------------------------------------------------------------------------------------------------------------------------------------------------------------------------------------------------------------------------------------------|
|               | <p>AGCGCGAGCTGGACCTGATGAGAGTGGACAACCTGCCTAATGGCTCTGGCGGCGCA-GAACCTG-</p> <p>TACTTCCAAGGGGAAAATCTCTACTTTCAAGGCGGCAGCGGCGGCATCAAGATCGCCAC</p> <p>AAGAAAGTACCTGGGCAAGCAGAACGTGTACGACATCGGCGTGGAACGGGAC-</p> <p>CACAACTTCGCCCTGAAGAACGGCTTTATCGCCAGCAACTGCGTTCCTCTAAGGGAAA</p> <p>CCTGGCCGATGTGGCCCCTGGCAAGTCTATCGGCGGCGACATCTTCAGCAACAGA-GAGGG-</p> <p>CAAGCTGCCTGGCAAGAGCGGCAGAACTTGGAGAGAGGCCGACATCAACTACACCAGC</p> <p>GGCTTCCGGAACAGCGACCGGATCCTGTACAGCAGCGACTGGCTGATCTACAAGAC-CAC-</p> <p>CGACCACTACCAGACCTTCACCAAGATCAGATGAATCTAGACCTTCTGCGGGGCTTGCCT</p> <p>TCTGGCCATGCCCTTCTTCTCTCCCTTGCACCTGTACCTCTTGGTCTTTGAATAAA-</p> <p>GCCTGAGTAGGAAAAAAAAAAAAAAAAAAAAAAAAAAAAAAAAAAAAAAAAAAAAAAAAA</p> <p>AAAAAAAAAAAAAAAAAAAAAAAAAAAAAAAAAAAAAAAAAAAAAAAAAAAAAAAAAAAAA</p> <p>AAAAAAAAAAAAAAAAAAAAAAAAA</p>                                                                                                                                                                    |
| ID            | hBarnase-65N                                                                                                                                                                                                                                                                                                                                                                                                                                                                                                                                                                                                                                                                                                                                                                                                                                                                                                                                                              |
| Template pDNA | pUTR2-hBarnase-65N                                                                                                                                                                                                                                                                                                                                                                                                                                                                                                                                                                                                                                                                                                                                                                                                                                                                                                                                                        |
| Primers       | HNC-542, HNT-7 and HNT-9                                                                                                                                                                                                                                                                                                                                                                                                                                                                                                                                                                                                                                                                                                                                                                                                                                                                                                                                                  |
| Features      | <p>T7 promoter (for CleanCap AG Reagent): 11-30, Kozak sequence (including start codon): 79-87, N-terminal split Barnase gene: 88-279, Caged eNpu N-intein gene: 280-846, Anti-eDHFR nanobody Nb113 gene: 853-1254, Stop codon: 1255-1257</p>                                                                                                                                                                                                                                                                                                                                                                                                                                                                                                                                                                                                                                                                                                                             |
| Sequence      | <p>CAGTGAATTGTAATACGACTCACTATAAGGCGAATTAAGAGAGAAAAGAAGAGTAA-GAA-</p> <p>GAAATATAAGACACCGGTCGCCACCATGGCCCAAGTGATCAACACCTTCGACGGCGTGG</p> <p>CCGACTACCTGCAGACATAACCACAAGCTGCCCCGACAACCTACATCACCAA-</p> <p>GAGCGAGGCCCAGGCTCTCGGATGGGTTGCCTCTAAGGGAAACCTGGCCGATGTGGCCC</p> <p>CTGGCAAGTCTATCGGCGGCGACATCTTCAGCAACAGAGAGGGCAAGCTGCCTT-GCCTGAGC-</p> <p>TACGAGACAGAGATCCTGACCGTGGAATACGGCCTGCTGCCTATCGGCAAGATCGTGGA</p> <p>AAAGCGGATCGAGTGCACCGTGTACAGCGTGGACAACAACGG-</p> <p>CAACATCTACACCCAGCCTGTGGCTCAGTGGCACGACAGAGGCAAGCAGAAGGTGTTCC</p> <p>AGTACTGCCTGGAAGATGGCAGCCTGATCAGAGCCACCAAGGAC-</p> <p>CACAAGTTCATGACAGTG-</p> <p>GACGGCCAGATGCTGCCCATCAAAGAGATCTTCCGGCGGAAGCTGGACCTGATGAGAGT</p> <p>GGACAACCTGCCTAATGGCTCTGGCGGCGAGAACCTGTACTTCCAAGGGGAAAATCTC-</p> <p>TACTTTCAAGGCGGCAGCGGCGGCATCGAGATCGCCACAGAGAAGTATCTGGGCGAGC</p> <p>AGAACGTGTACGACATCGGCGTGGAACGGGACCACAACCTTCGCCCTGAAGAAC-GGCGGC-</p> <p>TACTTCCAGGGAATTGAGATTGCCACCGAGAAATACCTCGGGGAACAGAATGTGTATGA</p> |

|               |                                                                                                                                                                                                                                                                                                                                                                                                                                                                                                                                                                                                                                                                                                                                                                                                                                                                                                                                                                                                                                                                                                     |
|---------------|-----------------------------------------------------------------------------------------------------------------------------------------------------------------------------------------------------------------------------------------------------------------------------------------------------------------------------------------------------------------------------------------------------------------------------------------------------------------------------------------------------------------------------------------------------------------------------------------------------------------------------------------------------------------------------------------------------------------------------------------------------------------------------------------------------------------------------------------------------------------------------------------------------------------------------------------------------------------------------------------------------------------------------------------------------------------------------------------------------|
|               | <p>TATCGGAGTCGAGCGCGATCACAATTTTGCCTGAAAAATGGCG-<br/> GATCCCAGGTCCAGCTG-<br/> CAAGAGTCTGGCGGAGGACTTGTTCAAGGCTGGCGGAAGCCTGAGACTGAGCTGTACTGC<br/> CAGCGGCAGAACCTTCAGCAGCTATGCCATGGGCTGGTTCAGACAGACCCCTGGCAAA-<br/> GAAC-<br/> GCGAGTTTCGTGGCCGCCATTACATGGGGCGGAAGCACAACACTGTACGCCGACTCTGTG<br/> AAGGGCAGATTACCATGAGCCGGGACAACGCCAAGAACACCGTGTACCTG-<br/> CAGATGAACAGCCTGAAGCCAGAGGACACCGCCGTGTACTATTGTGCCGCCGATGGCAG<br/> CCAGTACAGAAGCACCTACAGCTTCAGAGACAAGCCCGACTACGGCTCTT-<br/> GGGGCCAGGGAACACAAGTGACCGTGTCTCTCACCACCACCATCACCATTGAATCTAG<br/> ACCTTCTGCGGGGCTTGCCTTCTGGCCATGCCCTTCTTCTCTCCCTTGACCTGTAC-<br/> CTCTT-<br/> GGTCTTTGAATAAAGCCTGAGTAGGAAAAAAAAAAAAAAAAAAAAAAAAAAAAAAAAA<br/> AAAAAAAAAAAAAAAAAAAAAAAAAAAAAAAAAAAAAAAAAAAAAAAAAAAAAAAAAAAA<br/> AAAAAAAAAAAAAAAAAAAAAAAAAAAAAAAAAAAAAAAAAAAAAAAAAAAA</p>                                                                                                                                                                                                                                                                               |
| ID            | hBarnase-65C                                                                                                                                                                                                                                                                                                                                                                                                                                                                                                                                                                                                                                                                                                                                                                                                                                                                                                                                                                                                                                                                                        |
| Template pDNA | pUTR2-hBarnase-65C                                                                                                                                                                                                                                                                                                                                                                                                                                                                                                                                                                                                                                                                                                                                                                                                                                                                                                                                                                                                                                                                                  |
| Primers       | HNC-542, HNT-7 and HNT-9                                                                                                                                                                                                                                                                                                                                                                                                                                                                                                                                                                                                                                                                                                                                                                                                                                                                                                                                                                                                                                                                            |
| Features      | T7 promoter (for CleanCap AG Reagent): 11-30, Kozak sequence (including start codon): 79-87, Anti-eDHFR nanobody CA1698 gene: 91-459, Caged eNpu C-intein gene: 466-792, C-terminal split Barnase gene: 793-933, Stop codon: 934-936                                                                                                                                                                                                                                                                                                                                                                                                                                                                                                                                                                                                                                                                                                                                                                                                                                                                |
| Sequence      | <p>CAGTGAATTGTAATACGACTCACTATAAGCGCAATTAAGAGAGAAAAGAAGAGTAA-<br/> GAA-<br/> GAAATATAAGACACCGGTCGCCACCATGGCCCAGGTCCAGCTGCAAGAGTCTGGCGGA<br/> GGACTTGTTCAAGGCTGGCGGAAGCCTGAGACTGAGCTGTAAAGCCAGCGG-<br/> CATCATCTTCAGCGTGTACAAGATGACCTGGTACAGACAGGCCCTGGCAAAGAGAGAG<br/> AGCTGGTTGCCCTGATCACCAACAACAATACCATGACCGTGGACAGCGTGAAGGG-<br/> CAGATTCACCATCAGCCGGGACAACGTGCAGAACACCGTGTACCTGGAAATGAACAAT<br/> CTGAAGCCCGAGGACACCGCCGTGTACTACTGCAACGCCAATAGAGGACTGGCCGGAC-<br/> CTGCCTATTGGGGCCAGGGAACACAAGTGACCGTGTCTCTCACCACCACCATCACCAT<br/> GGATCCGGCGAACAAGAAGTGTTTCGAGTACTGCCTGGAAGATGG-<br/> CAGCCTGATCAGAGCCAC-<br/> CAAGGACCACAAGTTCATGACCGTGGACGGCCAGATGCTGCCCATCGACGAGATCTTCG<br/> AGCGCGAGCTGGACCTGATGAGAGTGGACAACCTGCCTAATGGCTCTGGCGGCGA-<br/> GAACCTG-<br/> TACTTCCAAGGGGAAAATCTCTACTTTCAAGGCGGCAGCGGCGGCATCAAGATCGCCAC<br/> AAGAAAGTACCTGGGCAAGCAGAACGTGTACGACATCGGCGTGGAACGGGAC-<br/> CACAACCTTCGCCCTGAAGAACGGCTTTATCGCCAGCAACTGCGGCAAGAGCGGCAGAA<br/> CTTGAGAGAGGCCGACATCAACTACACCAGCGGCTTCCGGAACAGCGACCG-<br/> GATCCTG-<br/> TACAGCAGCGACTGGCTGATCTACAAGACCACCGACCACTACCAGACCTTCACCAAGAT</p> |

[illegible]

[illegible]



|                  |                                                                                                                                                                                                                                                                                                                                                                                                                                                                                                                                                                                                                                                                                                                                                                                                                                                                                                                                                                                                                                                                                                                                                                                                                                                                                                                                                                                                                                                                                                                                                                                                                                                         |
|------------------|---------------------------------------------------------------------------------------------------------------------------------------------------------------------------------------------------------------------------------------------------------------------------------------------------------------------------------------------------------------------------------------------------------------------------------------------------------------------------------------------------------------------------------------------------------------------------------------------------------------------------------------------------------------------------------------------------------------------------------------------------------------------------------------------------------------------------------------------------------------------------------------------------------------------------------------------------------------------------------------------------------------------------------------------------------------------------------------------------------------------------------------------------------------------------------------------------------------------------------------------------------------------------------------------------------------------------------------------------------------------------------------------------------------------------------------------------------------------------------------------------------------------------------------------------------------------------------------------------------------------------------------------------------|
|                  | <p>CCGACTACCTGCAGACATACCACAAGCTGCCCCGACAACTACATCACCAA-<br/> GAGCGAGGCCAGGCTCTCGGATGGGTTGCCTCTAAGGGAAACCTGGCCGATGTGGCCC<br/> CTGGCAAGTCTATCGGCGGCGACATCTTCAGCAACAGAGAGGGCAAGCTGCCTGGCAA-<br/> GAGCGGCAGAACTTGGAGAGAGGGCCGACATCAACTACACCAGCTGCCTGAGCTACGAG<br/> ACAGAGATCCTGACCGTGGAATACGGCCTGCTGCCTATCGGCAAGATCGTGGA AAA-<br/> GCG-<br/> GATCGAGTGCACCGTGTACAGCGTGGACAACAACGGCAACATCTACACCCAGCCTGTGG<br/> CTCAGTGGCACGACAGAGGCAAGCAGAAGGTGTTTCGAGTACTGCCTGGAAGATGG-<br/> CAGCCTGATCAGAGCCACCAAGGACCACAAGTTCATGACAGTGGACGGCCAGATGCTG<br/> CCCATCAAAGAGATCTTCCGGCGGAAGCTGGACCTGATGAGAGTGGACAAC-<br/> CTGCCTAATGGCTCTGGCGGCGAGAACCTGTACTTCCAAGGGGAAAATCTCTACTTTCAA<br/> GGCGGCAGCGGCGGCATCGAGATCGCCACAGAGAAGTATCTGGGCGAGCAGAACGTG-<br/> TAC-<br/> GACATCGGCGTGGAACGGGACCACAACCTTCGCCCTGAAGAACGGCGGCTACTTCCAGG<br/> GAATTGAGATTGCCACCGAGAAATACCTCGGGGAACAGAATGTGTATGATATCGGAG-<br/> TCGAGCGCGATCACAATTTGCCCTGAAAAATGGCGGATCCGCTCAGGTGCAGCTGGTG<br/> GAATCTGGTGGTAGACTGGTGCAGGCCGGCGATAGCCTGAGACTGTCTT-<br/> GTGCCGCCAGCGG-<br/> CAGAACCTTTAGCACATCTGCCATGGCCTGGTTCAGACAGGCCCTGGCAGAGAAAGGG<br/> AATTCGTGGCCGCCATCACATGGACCGTGGGCAATAC-<br/> CATCCTGGGCGACTCTGTGAAGGG-<br/> CAGATTCACCATCAGCCGGGACAGAGCCAAGAACACCGTGGACCTGCAGATGGACAAC<br/> CTGGAACCTGAGGACACCGCCGTGTACTACTGCAGCGCCAGATCTAGAGGCTAC-<br/> GTGCTGTCCGTGCTGAGAAGCGTGGACAGCTACGATTATTGGGGCCAGGGCACCCAAGT<br/> GACCGTGTCTTGAATCTAGACCTTCTGCGGGGCTT-<br/> GCCTTCTGGCCATGCCCTTCTTCTCTCCCTTGACCTGTACCTCTTGGTCTTTGAATAAAGC<br/> CTGAGTAG-<br/> GAAAAAAAAAAAAAAAAAAAAAAAAAAAAAAAAAAAAAAAAAAAAAAAAAAAAAAAAAAAA<br/> AAAAAAAAAAAAAAAAAAAAAAAAAAAAAAAAAAAAAAAAAAAAAAAAAAAAAAAAAAAAA<br/> AAAAAAAAAAAAA</p> |
| ID               | GFPenhNb-hBarnase-81C                                                                                                                                                                                                                                                                                                                                                                                                                                                                                                                                                                                                                                                                                                                                                                                                                                                                                                                                                                                                                                                                                                                                                                                                                                                                                                                                                                                                                                                                                                                                                                                                                                   |
| Template<br>pDNA | pUTR2-GFPenhNb-NpuCcage-hBarnase-81C                                                                                                                                                                                                                                                                                                                                                                                                                                                                                                                                                                                                                                                                                                                                                                                                                                                                                                                                                                                                                                                                                                                                                                                                                                                                                                                                                                                                                                                                                                                                                                                                                    |
| Primers          | HNC-542, HNT-7 and HNT-9                                                                                                                                                                                                                                                                                                                                                                                                                                                                                                                                                                                                                                                                                                                                                                                                                                                                                                                                                                                                                                                                                                                                                                                                                                                                                                                                                                                                                                                                                                                                                                                                                                |
| Features         | T7 promoter (for CleanCap AG Reagent): 11-30, Kozak sequence (including start codon): 79-87, Anti-EFGP GFP enhancer nanobody gene: 88-432, Caged eNpu C-intein gene: 439-765, C-terminal split Barnase gene: 766-858, Stop codon: 859-861                                                                                                                                                                                                                                                                                                                                                                                                                                                                                                                                                                                                                                                                                                                                                                                                                                                                                                                                                                                                                                                                                                                                                                                                                                                                                                                                                                                                               |
| Sequence         | <p>CAGTGAATTGTAATACGACTCACTATAAGGCGAATTAAGAGAGAAAAGAAGAGTAA-<br/> GAA-<br/> GAAATATAAGACACCGGTCGCCACCATGGCTCAGGTGCAGCTTGTGTAATCTGGCGGAG</p>                                                                                                                                                                                                                                                                                                                                                                                                                                                                                                                                                                                                                                                                                                                                                                                                                                                                                                                                                                                                                                                                                                                                                                                                                                                                                                                                                                                                                                                                                                             |
